# Supplementary material for: Experimental evolution reveals hidden diversity in evolutionary pathways
Source: eLife journal article supplement (doi:10.7554/elife.07074), 2015-03-25

24 h

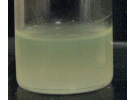

SBW25 SM

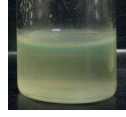

WspF S301R

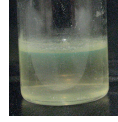

PFLU0085  
del 361-414

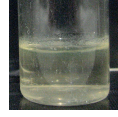

PFLU0183  
Fusion

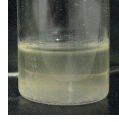

AwsX  
del 77-87

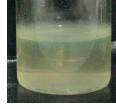

PFLU0085  
V447G

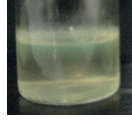

PFLU0085  
del 437-458

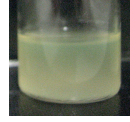

PFLU5960  
D160G

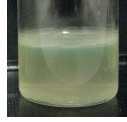

PFLU0085  
L408P

72 h

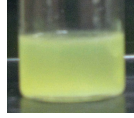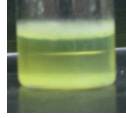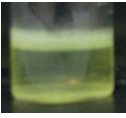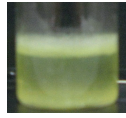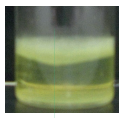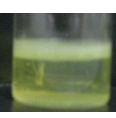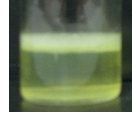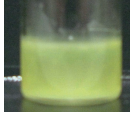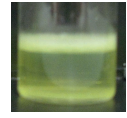

24 h

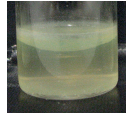

PFLU4306  
Fusion

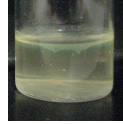

PFLU4308  
Fusion

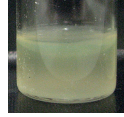

PFLU3448  
A200V

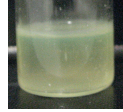

PFLU5698  
Promoter

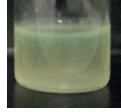

PFLU0956  
Promoter

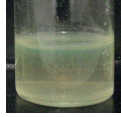

PFLU3571  
W13R

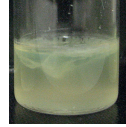

PFLU1349  
Promoter

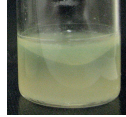

MwsR  
V728A

72 h

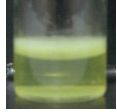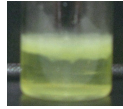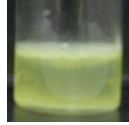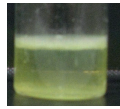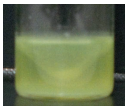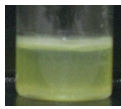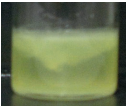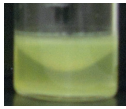

Supplement: supp [file elife-07074-supp-v1.zip]
