# Supplementary material for: Experimental evolution reveals hidden diversity in evolutionary pathways
Source: eLife journal article supplement (doi:10.7554/elife.07074), 2015-03-25

24 h

72 h

24 h

72 h

SBW25 SM

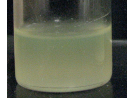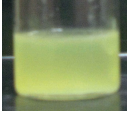

PFLU0458  
E45\*

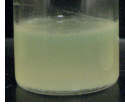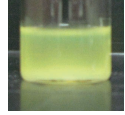

PFLU4744  
S39N

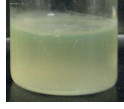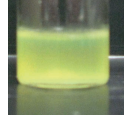

PFLU4744  
PFLU0458

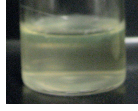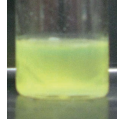

PFLU0458  
I835S

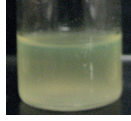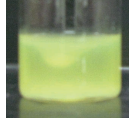

PFLU0621  
Promoter

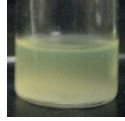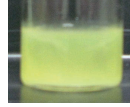

PFLU0458  
PFLU0621

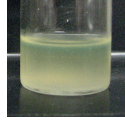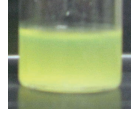

PFLU4443  
E398\*

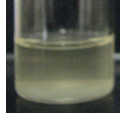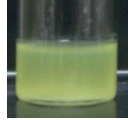

PFLU4414  
fs

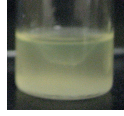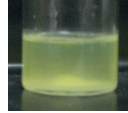

PFLU4744  
I44T

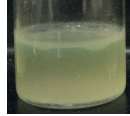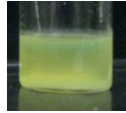

PFLU4443  
PFLU4414

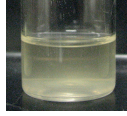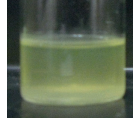

PFLU4443  
PFLU4744

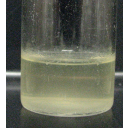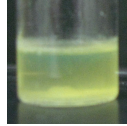

PFLU4414  
PFLU4744

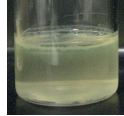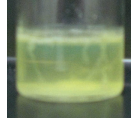

PFLU4443  
PFLU4414  
PFLU4744

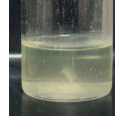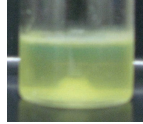

Supplement: supp [file elife-07074-supp-v1.zip]
