# Supplementary material for: Experimental evolution reveals hidden diversity in evolutionary pathways
Source: eLife. 2015 Mar 25;4:e07074. doi: 10.7554/eLife.07074 (PMC4395868; doi:10.7554/eLife.07074)
Supplement: Figure 3—source data 1. — DOI: http://dx.doi.org/10.7554/eLife.07074.006 [file elife07074s001.xls]

## Sheet: Sheet1
Table S1. Mutations found in 91 independent WS types evolved from SM ΔwspΔawsΔmws
Strain	Genome position	Type	Change	Gene position	Gene locus	Gene symbol	Annotation	Pfam	Uniprot	Effect	Comment
1	85763-861038	Deletion	del 477 bp	965-1440	PFLU0085		Conserved GGDEF domain protein	GGDEF	C3K6T5	In frame (del 322-480)
3	86066-86170	Deletion	del 95 bp	1368-1472	PFLU0085		Conserved GGDEF domain protein	GGDEF	C3K6T5	In frame (457-490)
4	85783-85941	Deletion	del 159 bp	1085-1243	PFLU0085		Conserved GGDEF domain protein	GGDEF	C3K6T5	In frame (del 361-414)	8 bp homology CGAGCGTC
5	85967-85972	Deletion	del 6 bp	1269-1274	PFLU0085		Conserved GGDEF domain protein	GGDEF	C3K6T5	In frame (del 424-425)
6	85921	Substitution	T->C	1223	PFLU0085		Conserved GGDEF domain protein	GGDEF	C3K6T5	L408P
7	85921	Substitution	T->C	1223	PFLU0085		Conserved GGDEF domain protein	GGDEF	C3K6T5	L408P
8	86038	Substitution	T->G	1340	PFLU0085		Conserved GGDEF domain protein	GGDEF	C3K6T5	V447G
9	85930	Substitution	T->C	1232	PFLU0085		Conserved GGDEF domain protein	GGDEF	C3K6T5	L411P
10	85950-85955	Deletion	del 6 bp	1252-1257	PFLU0085		Conserved GGDEF domain protein	GGDEF	C3K6T5	In frame (del 418-419)
12	86051-86059	Deletion	del 9 bp	1353-1361	PFLU0085		Conserved GGDEF domain protein	GGDEF	C3K6T5	In frame (del 452-454)
13	86044-86061	Deletion	del 18 bp	1346-1363	PFLU0085		Conserved GGDEF domain protein	GGDEF	C3K6T5	In frame (del 449-454)
14	85942	Substitution	T->C	1244	PFLU0085		Conserved GGDEF domain protein	GGDEF	C3K6T5	L415P
16	86022-86036	Deletion	del 15 bp	1324-1338	PFLU0085		Conserved GGDEF domain protein	GGDEF	C3K6T5	In frame (del 442-446)
17	85930	Substitution	T->C	1232	PFLU0085		Conserved GGDEF domain protein	GGDEF	C3K6T5	L411P
19	85977-85991	Deletion	del 15 bp	1279-1293	PFLU0085		Conserved GGDEF domain protein	GGDEF	C3K6T5	In frame (del 427-431)
21	85930	Substitution	T->C	1232	PFLU0085		Conserved GGDEF domain protein	GGDEF	C3K6T5	L411P
27	85910-85963	Deletion	del 54 bp	1212-1265	PFLU0085		Conserved GGDEF domain protein	GGDEF	C3K6T5	In frame (del 405-421)
33	85921	Substitution	T->C	1223	PFLU0085		Conserved GGDEF domain protein	GGDEF	C3K6T5	L408P
34	85921	Substitution	T->C	1223	PFLU0085		Conserved GGDEF domain protein	GGDEF	C3K6T5	L408P
38	86007-86072	Deletion	del 66 bp	1309-1374	PFLU0085		Conserved GGDEF domain protein	GGDEF	C3K6T5	In frame (del 437-458)	7 bp homology GGCCGCC
41	86038	Substitution	T->G	1340	PFLU0085		Conserved GGDEF domain protein	GGDEF	C3K6T5	V447G
43	86149-86160	Deletion	del 12 bp	1451-1462	PFLU0085		Conserved GGDEF domain protein	GGDEF	C3K6T5	In frame (del 484-487)
45	85963	Substitution	T->G	1265	PFLU0085		Conserved GGDEF domain protein	GGDEF	C3K6T5	L422S
48	85942	Substitution	T->C	1244	PFLU0085		Conserved GGDEF domain protein	GGDEF	C3K6T5	L415P
49	86072	Duplication	141 bp (86072-86212)	1514	PFLU0085		Conserved GGDEF domain protein	GGDEF	C3K6T5	Duplication in frame (459-504)
52	85942	Substitution	T->C	1244	PFLU0085		Conserved GGDEF domain protein	GGDEF	C3K6T5	L415P
54	85942	Substitution	T->C	1244	PFLU0085		Conserved GGDEF domain protein	GGDEF	C3K6T5	L415P
56	86038	Substitution	T->G	1340	PFLU0085		Conserved GGDEF domain protein	GGDEF	C3K6T5	V447G
57	86035	Substitution	A->C	1337	PFLU0085		Conserved GGDEF domain protein	GGDEF	C3K6T5	Q446P
61	86007-86072	Deletion	del 66 bp	1309-1374	PFLU0085		Conserved GGDEF domain protein	GGDEF	C3K6T5	In frame (del 437-458)	7 bp homology GGCCGCC
62	86035	Substitution	A->C	1337	PFLU0085		Conserved GGDEF domain protein	GGDEF	C3K6T5	Q446P
66	85783-85941	Deletion	del 159 bp	1085-1243	PFLU0085		Conserved GGDEF domain protein	GGDEF	C3K6T5	In frame (del 361-414)	8 bp homology CGAGCGTC
71	85961-85966	Deletion	del 6 bp	1263-1268	PFLU0085		Conserved GGDEF domain protein	GGDEF	C3K6T5	In frame (del 421-422)
72	86038	Substitution	T->G	1340	PFLU0085		Conserved GGDEF domain protein	GGDEF	C3K6T5	V447G
73	85930	Substitution	T->C	1232	PFLU0085		Conserved GGDEF domain protein	GGDEF	C3K6T5	L411P
74	85977-85991	Deletion	del 15 bp	1279-1293	PFLU0085		Conserved GGDEF domain protein	GGDEF	C3K6T5	In frame (del 427-431)
75	86047	Substitution	T->C	1349	PFLU0085		Conserved GGDEF domain protein	GGDEF	C3K6T5	L439S
76	85965-85967	Deletion	del 3 bp	1267-1269	PFLU0085		Conserved GGDEF domain protein	GGDEF	C3K6T5	In frame (del 423)
79	86038	Substitution	T->G	1340	PFLU0085		Conserved GGDEF domain protein	GGDEF	C3K6T5	V447G
84	85921	Substitution	T->C	1223	PFLU0085		Conserved GGDEF domain protein	GGDEF	C3K6T5	L408P
87	86024-86044	Deletion	del 21 bp	1326-1346	PFLU0085		Conserved GGDEF domain protein	GGDEF	C3K6T5	In frame del (443-449)
90	85938-85955	Deletion	del 18 bp	1240-1257	PFLU0085		Conserved GGDEF domain protein	GGDEF	C3K6T5	In frame (del 414-419)
91	85938-85955	Deletion	del 18 bp	1240-1257	PFLU0085		Conserved GGDEF domain protein	GGDEF	C3K6T5	In frame (del 414-419)
18	1062820	Substitution	T->A	-59	PFLU0956		Putative GGDEF domain membrane protein	GGDEF	C3KDE3	Promoter mutation
26	1062820	Substitution	T->A	-59	PFLU0956		Putative GGDEF domain membrane protein	GGDEF	C3KDE3	Promoter mutation
59	1062820	Substitution	T->A	-59	PFLU0956		Putative GGDEF domain membrane protein	GGDEF	C3KDE3	Promoter mutation
42	1062820-1062832	Deletion	del 13 bp	-59-71	PFLU0956		Putative GGDEF domain membrane protein	GGDEF	C3KDE3	Promoter mutation	3 bp homology AAA
46	1062820	Insertion	+A	-59	PFLU0956		Putative GGDEF domain membrane protein	GGDEF	C3KDE3	Promoter mutation
63	1062815	Substitution	T->G	-54	PFLU0956		Putative GGDEF domain membrane protein	GGDEF	C3KDE3	Promoter mutation
64	1062815	Insertion	+A	-54	PFLU0956		Putative GGDEF domain membrane protein	GGDEF	C3KDE3	Promoter mutation
67	1062815	Substitution	T->G	-54	PFLU0956		Putative GGDEF domain membrane protein	GGDEF	C3KDE3	Promoter mutation
86	1062817	Substitution	A->C	-57	PFLU0956		Putative GGDEF domain membrane protein	GGDEF	C3KDE3	Promoter mutation
11	6249974	Substitution	C->T	-96	PFLU5698		Putative GGDEF/EAL domain regulatory protein	REC, PAS, GGDEF, EAL	C3K3E5	Promoter mutation
15	6249949	Substitution	C->T	-73	PFLU5698		Putative GGDEF/EAL domain regulatory protein	REC, PAS, GGDEF, EAL	C3K3E5	Promoter mutation
40	6249949	Substitution	C->T	-73	PFLU5698		Putative GGDEF/EAL domain regulatory protein	REC, PAS, GGDEF, EAL	C3K3E5	Promoter mutation
55	6249956	Substitution	C->A	-80	PFLU5698		Putative GGDEF/EAL domain regulatory protein	REC, PAS, GGDEF, EAL	C3K3E5	Promoter mutation
80	6249974	Substitution	G->C	-98	PFLU5698		Putative GGDEF/EAL domain regulatory protein	REC, PAS, GGDEF, EAL	C3K3E5	Promoter mutation
88	6249974	Substitution	G->C	-98	PFLU5698		Putative GGDEF/EAL domain regulatory protein	REC, PAS, GGDEF, EAL	C3K3E5	Promoter mutation
70	6250514	Duplication	ins 14 bp	332-345	PFLU5699		Uncharacterized protein		C3K3E6	Frame shift 1-115 WT, +VFWLSYA
20	1489607-1490349	Deletion	del 743 bp	deletion from -65 PFLU1349 to 66 PFLU1351	PFLU1349		Putative signalling GGDEF/EAL domain membrane protein	MHYT, GGDEF, EAL	C3K8Z9	Promoter mutation for PFLU1349, lose PFLU1350, PFLU1351	2 bp homology
65	1489589-1489590	Duplication	+GA	-47--48	PFLU1349		Putative signalling GGDEF/EAL domain membrane protein	MHYT, GGDEF, EAL		Promoter mutation
2	208857-209323	Deletion	del 467 bp	PFLU0184:986-PFLU0183:85	PFLU0183		Conserved GGDEF domain protein	PAS_3, GGDEF	C3KBT3	PFLU0184 M1-T328 fused to PFLU0183 A29-G335	6 bp homology TGCTGG
32	208967-209127	Deletion	del 161 bp	PFLU0184:1182-PFLU0183:-26	PFLU0183		Conserved GGDEF domain protein	PAS_3, GGDEF	C3KBT3	PFLU0184 M1-A334 (+KFAARPER) fused to PFLU0183 L1-G335	no homology
39	208857-209323	Deletion	del 467 bp	PFLU0184:986-PFLU0183:85	PFLU0183		Conserved GGDEF domain protein	PAS_3, GGDEF	C3KBT3	PFLU0184 M1-T328 fused to PFLU0183 A29-G335	6 bp homology TGCTGG
44	208914-209440	Deletion	del 527 bp	PFLU0184:869-PFLU0183:28	PFLU0183		Conserved GGDEF domain protein	PAS_3, GGDEF	C3KBT3	PFLU0184 M1-Q289 (+V) fused to PFLU0183 V11-G335	no homology
47	208857-209323	Deletion	del 467 bp	PFLU0184:986-PFLU0183:85	PFLU0183		Conserved GGDEF domain protein	PAS_3, GGDEF	C3KBT3	PFLU0184 M1-T328 fused to PFLU0183 A29-G335	6 bp homology TGCTGG
51	208873-209744	Deletion	del 872 bp	PFLU0184:574-PFLU0183:78	PFLU0183		Conserved GGDEF domain protein	PAS_3, GGDEF	C3KBT3	PFLU0184 M1-T191 fused to PFLU0183 L27-G335	9 bp homology GCGGCGACC
58	208857-209323	Deletion	del 467 bp	PFLU0184:986-PFLU0183:85	PFLU0183		Conserved GGDEF domain protein	PAS_3, GGDEF	C3KBT3	PFLU0184 M1-T328 fused to PFLU0183 A29-G335	6 bp homology TGCTGG
85	208852-209276	Deletion	del 425 bp	PFLU0184:1033-PFLU0183:90	PFLU0183		Conserved GGDEF domain protein	PAS_3, GGDEF	C3KBT3	PFLU0184 M1-L344 fused to PFLU0183 V31-G335	9 bp homology CTGGCGCTG
25	4748031-4748473	Deletion	443 bp	PFLU4305:996-PFLU4306:-2	PFLU4306		Putative GGDEF/GAF domain sensory box protein	GGDEF	C3K054	PFLU4305 M1-L332 (L333V) fused to PFLU4306 V1-G489	no homology
28	4747578-4748494	Deletion	917 bp	PFLU4305:543-PFLU4306:20	PFLU4306		Putative GGDEF/GAF domain sensory box protein	GGDEF	C3K054	PFLU4305 M1-F181 fused to PFLU4306 M8-G489	no homology
36	4747324-4748534	Deletion	1211 bp	PFLU4305:289-PFLU4306:60	PFLU4306		Putative GGDEF/GAF domain sensory box protein	GGDEF	C3K054	PFLU4305 M1-Q96 fused to PFLU4306 S21-G489	no homology
37	4747699-4748534	Deletion	836 bp	PFLU4305:689-PFLU4306:60	PFLU4306		Putative GGDEF/GAF domain sensory box protein	GGDEF	C3K054	PFLU4305 M1-Q221 fused to PFLU4306 S21-G489	no homology
59	4748109-4748524	Deletion	416 bp	PFLU4305:1074-PFLU4306:50	PFLU4306		Putative GGDEF/GAF domain sensory box protein	GGDEF	C3K054	PFLU4305 M1-L357 (K358N) fused to PFLU4306 D18-G489	no homology
68	4748177-4748481	Deletion	305 bp	PFLU4305:1142-PFLU4306:7	PFLU4306		Putative GGDEF/GAF domain sensory box protein	GGDEF	C3K054	PFLU4305 M1-L380 (V381G) fused to PFLU4306 G3-G489	no homology
69	4747752-4748526	Deletion	775 bp	PFLU4305:717-PFLU4306:89	PFLU4306		Putative GGDEF/GAF domain sensory box protein	GGDEF	C3K054	PFLU4305 M1-S238 (W239C) fused to PFLU4306 Q31-G489	no homology
83	4748053-4748534	Deletion	482 bp	PFLU4305:1018-PFLU4306:60	PFLU4306		Putative GGDEF/GAF domain sensory box protein	GGDEF	C3K054	PFLU4305 M1-Y340 fused to PFLU4306 S21-G489	no homology
50	4752227-4756898	Deletion	4672 bp	PFLU4313 1-344 fused to PFLU4308 564-2463	PFLU4308		Putative signalling-related membrane protein	PAS, PAC, GGDEF, EAL	C3K056	PFLU4313 aa 1-115 fused to PFLU4308 189-820
89	1061800	Substitution	G->T	962	PFLU0956		Putative GGDEF domain membrane protein	GGDEF	C3KDE3	R321L
23	3819427	Substitution	C->T	599	PFLU3448		Putative signalling-related membrane protein	GGDEF	C3KCF7	A200V
60	3819426	Substitution	G->A	598	PFLU3448					A200T
77	3958618	Substitution	T->C	37	PFLU3571		Putative GGDEF domain signaling protein	HAMP, GGDEF	C3K7X1	W13R
78	3958618	Substitution	T->C	37	PFLU3571		Putative GGDEF domain signaling protein	HAMP, GGDEF	C3K7X1	W13R
81	3959627-3959713	Deletion	del 87 bp	1046-1132	PFLU3571		Putative GGDEF domain signaling protein	HAMP, GGDEF	C3K7X1	Del G349-A377 (GMTQSLLSKERQLQDANASLEATVAQRTA)
29	6518055	Substitution	T->C	479	PFLU5960		Putative EAL/GGDEF domain protein	GGDEF, EAL	C3K450	D160G
53	6518311	Substitution	C->T	223	PFLU5960		Putative EAL/GGDEF domain protein	GGDEF, EAL	C3K450	V75M
Double mutations
24	513490	Substitution	C>T	1754	PFLU0458	pch	Conserved GGDEF/EAL domain protein	GAF, PAS_9, GGDEF, EAL	C3KCP2	G585D
	5217806-5217812	Deletion	del ttgaaac	10-16	PFLU4744	amrZ, algZ	Putative DNA-binding protein	Arc	C3K0S0	Frame shift from L4
30	515036	Substitution	C>A	208	PFLU0458	pch	Conserved GGDEF/EAL domain protein	GAF, PAS_9, GGDEF, EAL	C3KCP2	E45*
	5217912	Substitution	G>A	116	PFLU4744	amrZ, algZ	Putative DNA-binding protein	Arc	C3K0S0	S39N
31	513536-513560	Deletion	del 25 bp	1684-1698	PFLU0458	pch	Conserved GGDEF/EAL domain protein	GAF, PAS_9, GGDEF, EAL	C3KCP2	Frame shift from V562	8 bp homology CCAACTG
	5217894	Substitution	C>T	98	PFLU4744	amrZ, algZ	Putative DNA-binding protein	Arc	C3K0S0	A33V
82	512740	Substitution	A>C	2504	PFLU0458	pch	Conserved GGDEF/EAL domain protein	GAF, PAS_9, GGDEF, EAL	C3KCP2	I835S
	707153	Substitution	C>T	-51	PFLU0621		Putative GGDEF domain response regulator	Response_reg, GGDEF	C3K6X0	Promoter mutation
Triple mutation
22	4878483	Deletion	del A	1954	PFLU4414	cheA	Chemotaxis histidine kinase	Hpt., H-kinase_dim., HATPase_c., CheW,	C3K0H7	Frame shift del Y652-I738, ins TSSVGWWHRLPMKSSAKAMW	AAAA homonucleotide tract
	4907363	Substitution	C>A	1192	PFLU4443	adnA, fleQ	Putative two-component system, response regulator nitrogen regulation protein NR(I)	FleQ, Sigma54_activat., HTH_8	C3K0U9	398E>*
	5217927	Substitution	T>C	131	PFLU4744	amrZ, algZ	Putative DNA-binding protein	Arc	C3K0S0	I44T
