# Supplementary material for: Experimental evolution reveals hidden diversity in evolutionary pathways
Source: eLife journal article supplement (doi:10.7554/elife.07074), 2015-03-25
Supplement: supp [file elife-07074-supp-v1.zip]

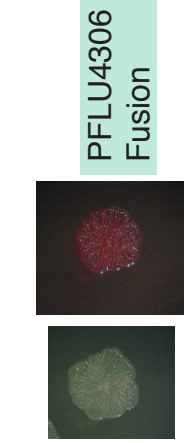

PFLU4306  
Fusion

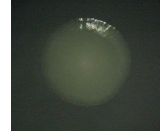

SBW25 SM

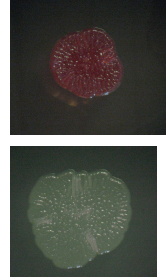

PFLU4308  
Fusion

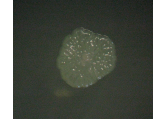

WspF S301R

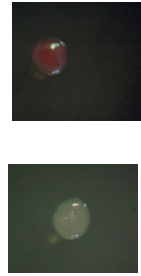

PFLU3448  
A200V

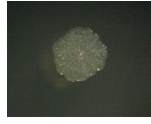

PFLU0085  
del 361-414

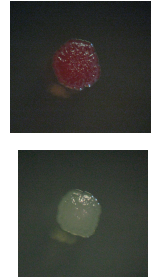

PFLU5698  
Promoter

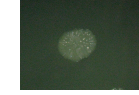

PFLU0183  
Fusion

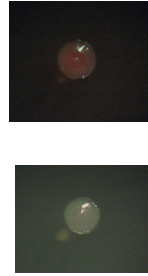

PFLU0956  
Promoter

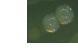

AwsX  
del 77-87

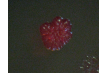

PFLU0085  
V447G

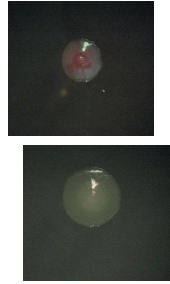

PFLU3571  
W13R

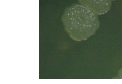

PFLU0085  
del 437-458

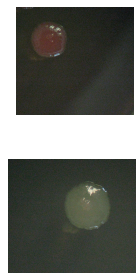

PFLU11349  
Promoter

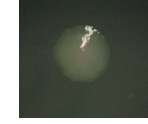

PFLU5960  
D160G

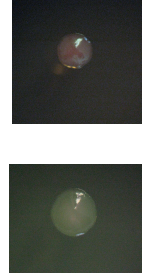

MwsR V728A

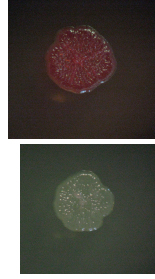

PFLU0085  
L408P
