# Supplementary material for: Experimental evolution reveals hidden diversity in evolutionary pathways
Source: eLife. 2015 Mar 25;4:e07074. doi: 10.7554/eLife.07074 (PMC4395868; doi:10.7554/eLife.07074)
Supplement: Supplementary file 2. — Oligonucleotide primers. DOI: http://dx.doi.org/10.7554/eLife.07074.017 [file elife07074s003.xls]

## Sheet: Sheet1
Table S2. Oligonucleotide primers	Sequence 5'-3'
Sanger sequencing
PFLU0084_UF	GATCGTCAACGGCAAATACC
PFLU0085_1010_F	CCTACAGCTCCGTAGCCAAG
PFLU0085_1141_R	TCGAGGATCGGTAGCAGTTC
PFLU0085_D_R	CTCAAGGTTGGTGGAGGTGT
PFLU0085_U_F	TCAGCCCTACCCTCACACTC
PFLU0620_470F	GTTACTTGCCCCCACTGCT
PFLU0620_646R	ATCATGGCCGAGAAGTCATC
PFLU0620_DR	CGGTGCATCAGTCAACACAT
PFLU0621_767F	AAGGTGCTGATCATCGACGA
PFLU0621_UF	ACGAAGATAACTGCGGTTGG
PFLU0956_60_R	AGAACAACAGTGAGGCCACT
PFLU0956_D_R	GAGATAAAAGTCGCCAGGCA
PFLU0956_U_F	ATGAGTACCGGGTGATCGTC
PFLU0956_U2F	CTGACGTTGACCCCGTTATT
PFLU1349_1004R	ATTGATGCGCTTGAAGTGGT
PFLU1349_937F	ATCTTCGCGGAGAAACTCG
PFLU1349_DR	ATTGATGCGCTTGAAGTGGT
PFLU1350_UF	TTCTGTCCCCTCTTCCCAAT
PFLU3448_F	GTCCCACCAAGGATTGATTG
PFLU3448_R	TGTGTCGATGTCTGTGTTGG
PFLU3571_774F	GAATGCGAAAGTGAGCTGGT
PFLU3571_981R	GGGTTGATTGTCTTGCACCT
PFLU3571_DR	AGGCCTCGCTGATGTACTTG
PFLU3571_UF	CTGTTTTTGCAGGTCCCAAT
PFLU4305_UF	TTCCTCTTCCAGGGTCTTGA
PFLU4306_342R	CGAGTTCCTCTTCCGACAAC
PFLU4306_342R	CGAGTTCCTCTTCCGACAAC
PFLU4306_DR	TGTTCCTGTTCCTGGAAAGC
PFLU4306_UF	AAACCTGCTGGACATTTTCG
PFLU4308_1096R	TGTCGTTGACCAGCTTGAAC
PFLU4308_1096R	TGTCGTTGACCAGCTTGAAC
PFLU4308_1267F	TACATTGCCAACCTGTCCTG
PFLU4308_1267F	TACATTGCCAACCTGTCCTG
PFLU4308_DR	CGGTTCTGTTGAATGTGTCG
PFLU4308_DR	CGGTTCTGTTGAATGTGTCG
PFLU4308_UF	CGGTCACATTGCTGAAGATG
PFLU4308_UF	CGGTCACATTGCTGAAGATG
PFLU4313_DR	ACGTTTATGGACCGCCTCTT
PFLU4313_DR	ACGTTTATGGACCGCCTCTT
PFLU4313_UF	GCACACTCCTTCAGGTTCGT
PFLU4313_UF	GCACACTCCTTCAGGTTCGT
PFLU5698_1054F	CTCCTATGACATTCTGGGGC
PFLU5698_1108R	ACGCGTTCGATCAGTTTTTC
PFLU5698_D_R	GAAGCTGCTCTTGGTCTTGC
PFLU5698_U_F	GGTTCCAGGTGGAAAGATCA
PFLU5960_F	GTTACTTTGCCGCAGGATGT
PFLU5960_R	AAGAGCCTGACCCTCTAGGC
Transposon insertion sites
TnphoA-II	GTGCAGTAATATCGCCCTGAGCA
CEKG 2A	GGCCACGCGTCGACTAGTACNNNNNNNNNNAGAG
CEKG 2B	GGCCACGCGTCGACTAGTACNNNNNNNNNNACGCC
CEKG 2C	GGCCACGCGTCGACTAGTACNNNNNNNNNNGATAT
hah-1	ATCCCCCTGGATGGAAAACGG
CEKG 4	GGCCACGCGTCGACTAGTAC
qPCR
PFLU0956_RT_F	CTGATCGTGGTAGTGGCACT
PFLU0956_RT_R	AACCCATACACAGAAAGCCG
PFLU5698_RT_F	TTCGACCCGCATATCCTCAA
PFLU5698_RT_R	CGGGCAGACTCCAAATCATG
PFLU1349_RT_F	GCGGTGATGAGTTCTGCATT
PFLU1349_RT_R	AGTTCGATGGGCTCCTTCAT
PFLU0621_RT_F	CGCTTTGCCGAAATCCACTA
PFLU0621_RT_R	ATCATCAGGCTGTCGGAGTC
PFLU4308_RT_F	GATGACATCCCTGGACCGTT
PFLU4308_RT_R	GATCGCACACATGGCCATAG
PFLU4306_RT_F	AGTTTCTGATCCTGCTGTCCA
PFLU4306_RT_R	GTCATCCGCCCAGTAGTCTT
PFLU0183_RT_F	GCCGAAGACATCACCGAAAA
PFLU0183_RT_R	GAAGAAGTGTCGGCGGTTG
PFLU0085_RT_F	CGACAGGGTGCTGAAGATCA
PFLU0085_RT_R	TCAGCAACACGAACTCCTCA
recA_RT_F	AAGCCCTGGAAATCACCGA
recA_RT_R	CCTTCGATTTCAGCCTTGGG
Reconstruction of mutations
PFLU0085_792F_BglII	GAAGATCTCCGTTGAAGCGTCCGTAGTA
PFLU0085_1918R_SpeI	GAACTAGTACAGTGATCGTTACCGGCTC
PFLU0957_850F_BglII	GAAGATCTCACCTACAGCCTGCACTTCA
PFLU0956_418R_SpeI	GAACTAGTCAGTCGCAATGGATCTTGAA
PFLU1349_-591F_BglII	GAAGATCTATCCTGGGACTTTCCCTACG
PFLU1349_453R_SpeI	GAACTAGTAGTCGAAATACAGTTGGGCC
PFLU4305_-66F_BglII	GAAGATCTCAGTATTCCCTTGGCGACTG
PFLU4306_573R_SpeI	GAACTAGTGCTTGAAGTGATCGATGTCG
PFLU4313_-148F_BglII	GAAGATCTCGCAGTTTAGGCTGTGATGA
PFLU4308_1069R_SpeI	GAACTAGTTCCTGGGTCATATCATGCAA
PFLU3448_27F_BglII	GAAGATCTTCGACCCTCCTACGATTTTG
PFLU3448_1082R_SpeI	GAACTAGTTTCATACAGCGTGGTATCGC
PFLU3570_339F_PacI	CTTAATTAACGAACCACTTGGTCATTTCC
PFLU3571_517R_SpeI	GAACTAGTATGGTTTCACCTTGTGCGTT
PFLU5699_380F_BglII	GAAGATCTAATCACGATTTTGCCGGTAG
PFLU5698_335R_SpeI	GAACTAGTGTCGAAGGGTTTGAACAGGT
PFLU5960_-198F_BglII	GAAGATCTTTAACAGGCTGGCAGGATTC
PFLU5960_883R_SpeI	GAACTAGTCGCAGTTCACTTTCCAGGTC
PFLU0621_-1011F_PacI	CTTAATTAAGTTTTCAGTGCGGTGTTGAG
PFLU0621_99R_BglII	GCGCTGCCAGATCTCAAGAA
PFLU0458_-339F1_BglII	GAAGATCTGACATCCGCACTATCCTGCT
PFLU0458_836R1_SpeI	GAACTAGTCTTTGTTCTCGGCCATTTC
PFLU0458_1974F2_BglII	GAAGATCTACGTGTTCTACCAGCCCAAG
PFLU0457_253R2_SpeI	GAACTAGTTCTTCATAGGTCGGGTTCG
PFLU4744_-341F_SpeI	CGGCAAATTGCCACTAGTCT
PFLU4745_1414R_BglII	GAAGATCTTGGTGGCTTCTTCATCTTCC
PFLU4414_F_1670BglII	GAAGATCTACCAAGACCGAGATCTCCGA
PFLU4413_216R_SpeI	GAACTAGTTGCATGATATGGCGAACTG
PFLU4443_641F_BglII	GAAGATCTAATTGTTCGGCCATGAGAAG
PFLU4443_243dsR_SpeI	GAACTAGTAGTTAAACGGAACGTTGCGA
