# Supplementary figures and images for: Experimental evolution reveals hidden diversity in evolutionary pathways
Source: eLife journal article supplement (doi:10.7554/elife.07074), 2015-03-25

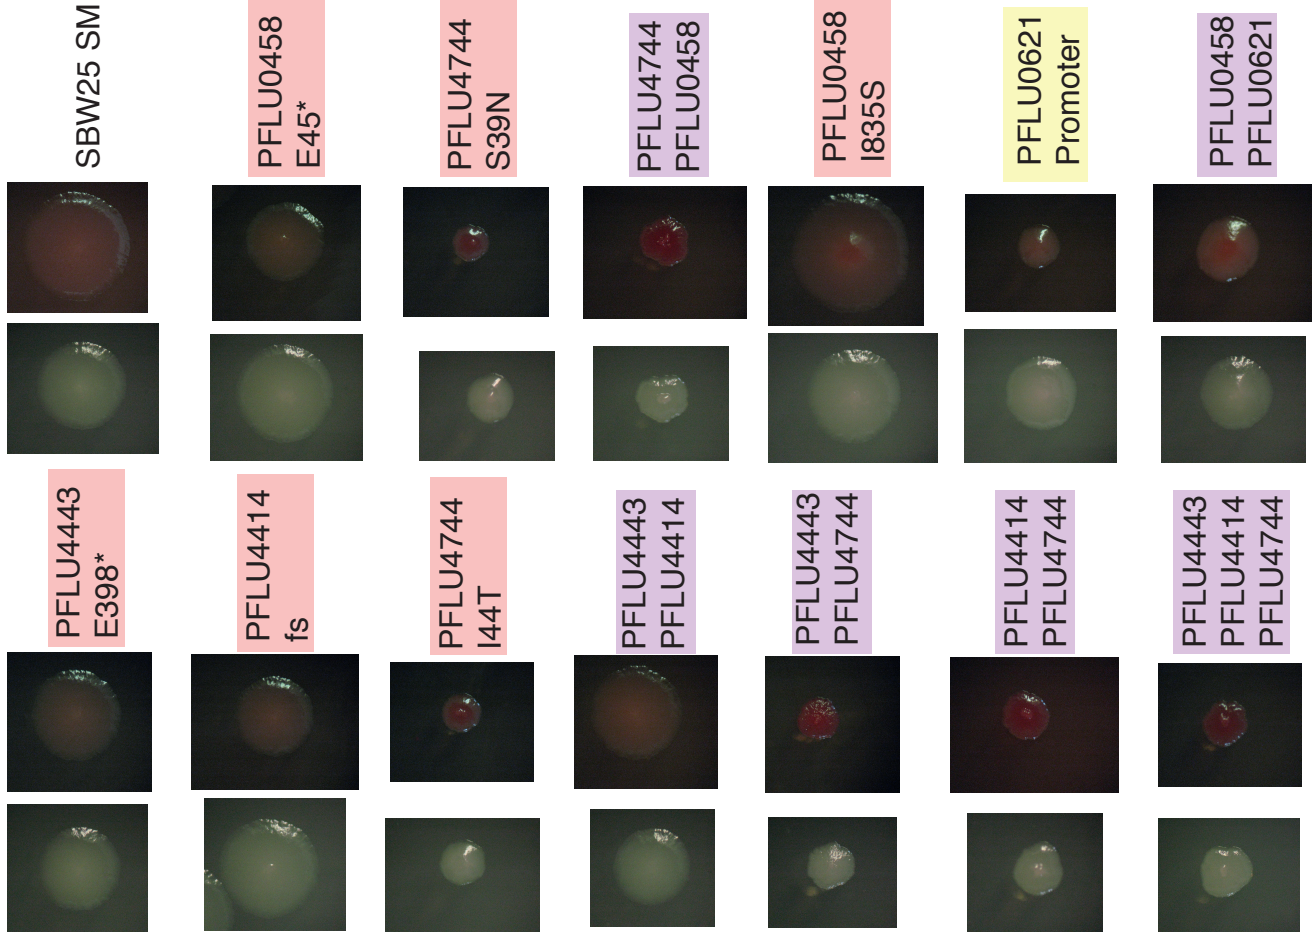

Supplement: supp [file elife-07074-supp-v1.zip]
